# Supplementary material
Source: PubMed Central journal article supplement (PMC3975503)
Supplement: cr201425x1.pdf [file cr201425x1.pdf]

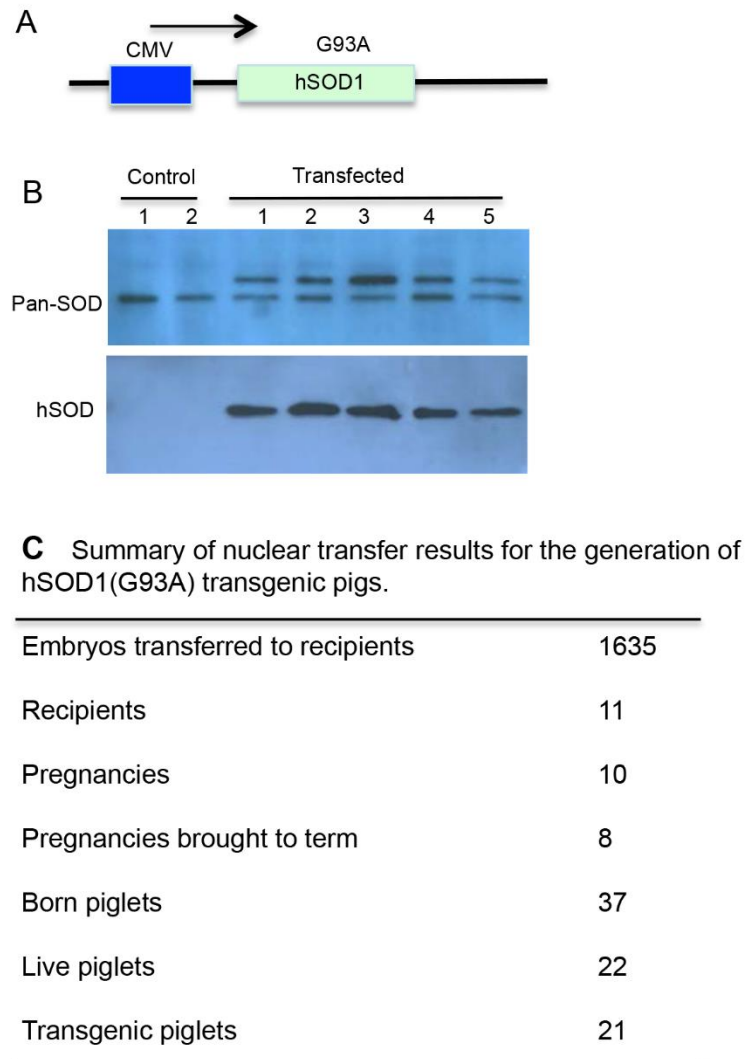

**Supplementary information, Figure S1** Generation of hSOD1 transgenic piglets.

(A) The DNA construct used to transfect cultured pig fibroblast cells. (B) Western blot analysis to identify cell lines that express mutant hSOD1, and these cell lines were used for nuclear transfer to produce transgenic pigs. (C) Summary of the transgenic hSOD1 piglets.
