# Supplementary material
Source: PubMed Central journal article supplement (PMC3975503)
Supplement: cr201425x2.pdf [file cr201425x2.pdf]

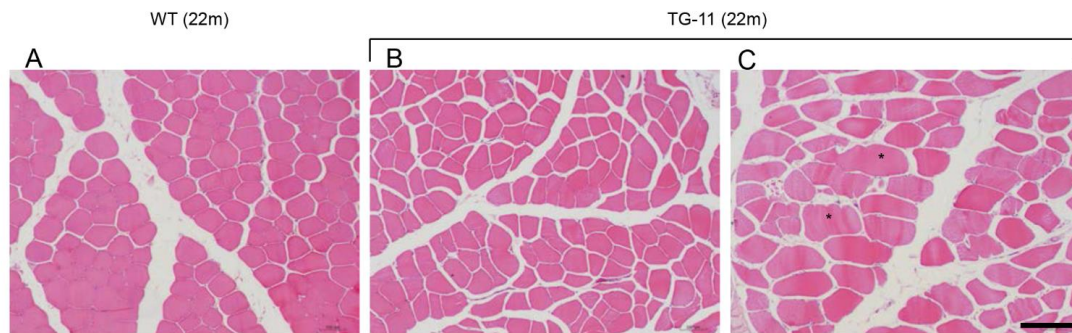

**Supplementary information, Figure S2** Muscle atrophy in hSOD1 transgenic pig.

Hematoxylin and eosin stained cross-sections of gastrocnemius muscle showing increased fiber size variation and reduced mean fiber size of the 22-month-old TG-11 transgenic pig (B, C), compared with age-matched WT pig (A). There are numerous random atrophic-angulated fibers with irregular contours in TG-11 muscle. Accompanied with atrophic fibers, compensatory hypertrophy of muscle fibers (asterisk) can also be observed in TG-11 muscle. Scale bars: 200  $\mu\text{m}$ .
