# Supplementary material
Source: PubMed Central journal article supplement (PMC3975503)
Supplement: cr201425x3.pdf [file cr201425x3.pdf]

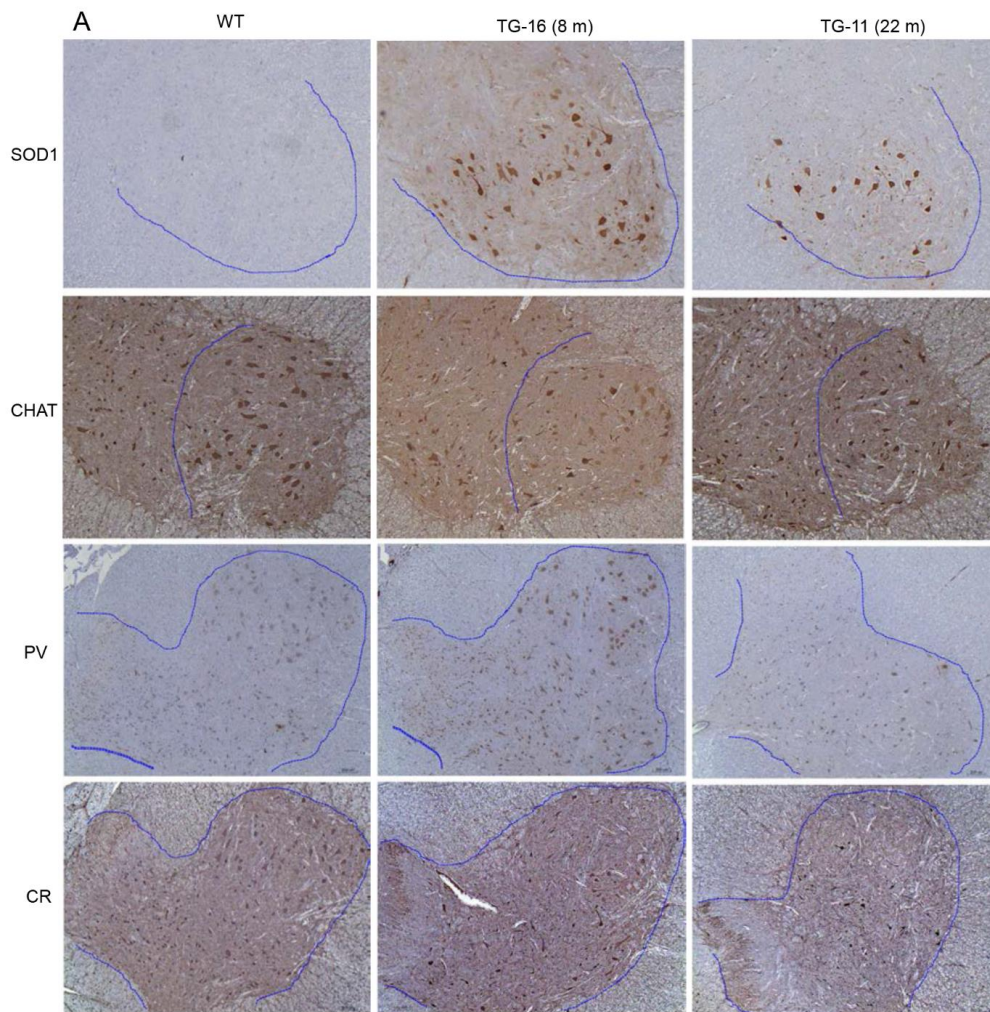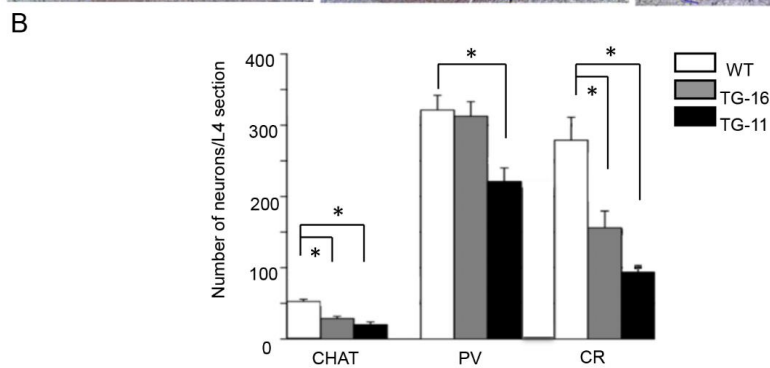

**Supplementary information, Figure S3** Loss of neuronal cells in the spinal cord of hSOD1 transgenic pigs.

(A) Photomicrographs of the spinal cords of wild-type and hSOD1 transgenic pigs (TG-16 at 8 months and TG-11 at 22 months) that were stained by antibodies to hSOD1, CHAT, PV, and CR. (B) The numbers of stained neurons in the lumbar spinal cords of wild-type (WT) and hSOD1 transgenic pigs. The mean numbers  $\pm$  SEM of neurons for WT ( $n = 3$ ) and hSOD1 transgenic ( $n = 3$ ) pigs are represented. \*,  $P < 0.001$ . Scale bars: 200  $\mu$ m.
