# Supplementary material
Source: PubMed Central journal article supplement (PMC3975503)
Supplement: cr201425x4.pdf [file cr201425x4.pdf]

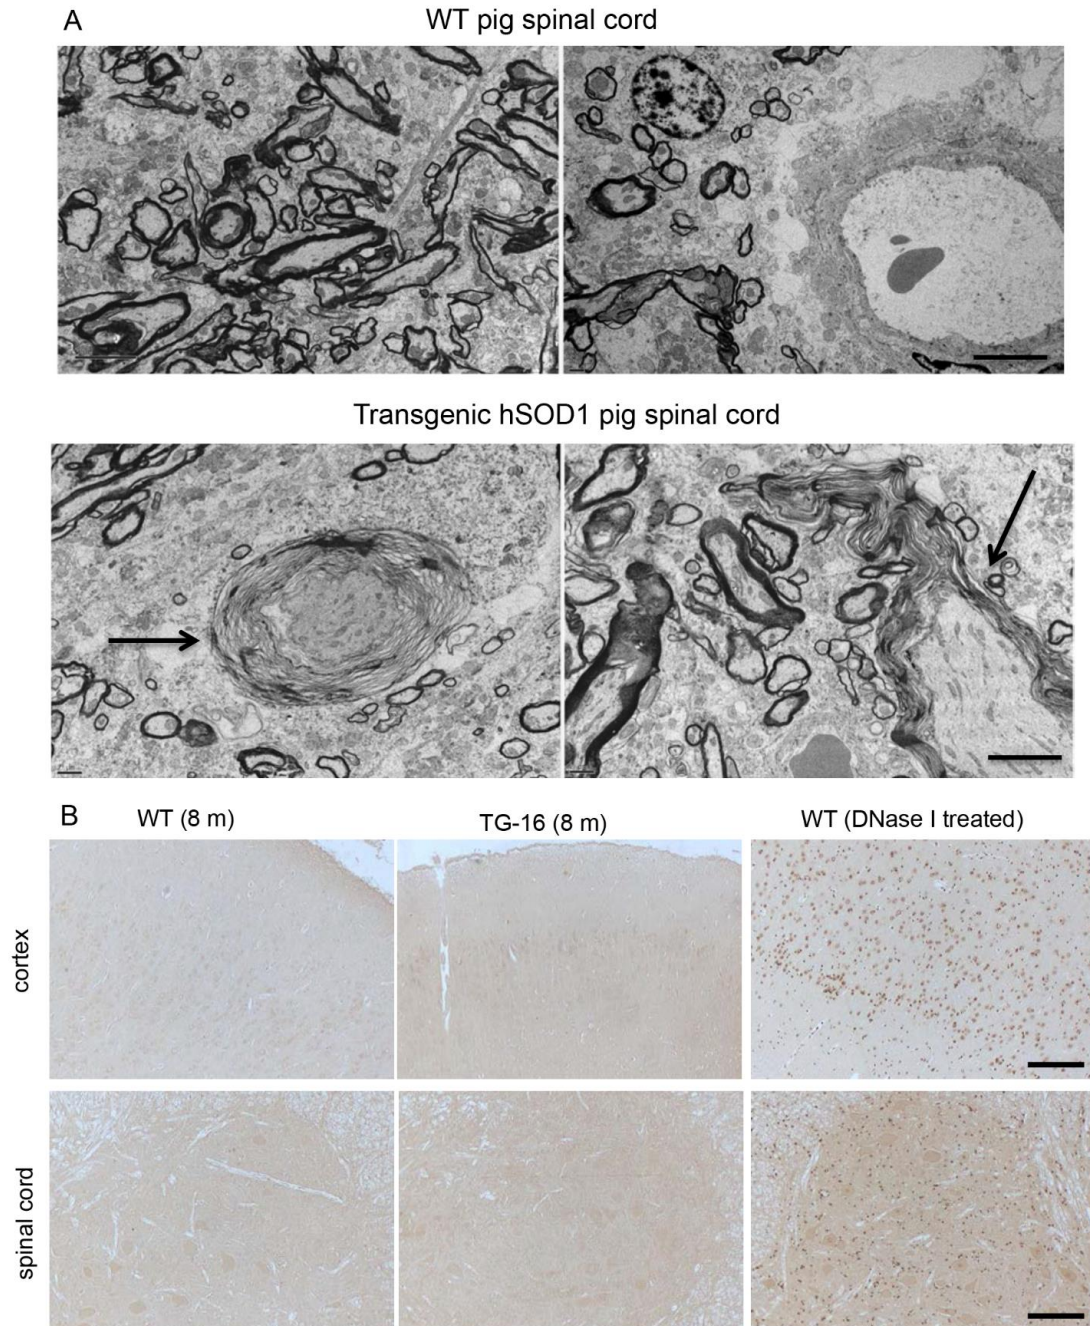

**Supplementary information, Figure S4 Axonal degeneration in hSOD1 transgenic pig.**

(A) Electron microscopy showing demyelinated axons (arrows) in the spinal cord in TG-16 transgenic pig, but not in wild-type pig. Scale bars: 5  $\mu$ m. (B) TUNEL staining did not reveal apoptotic cells in the lumbar spinal cord and cortex of TG-16 transgenic pig at 8 months of age. DNase I treated tissues containing fragmented DNAs were used as positive controls.

Scale bars: 200  $\mu$ m.
