# Supplementary material
Source: PubMed Central journal article supplement (PMC3975503)
Supplement: cr201425x5.pdf [file cr201425x5.pdf]

**Supplementary information, Table S1** Copy numbers of the mutant hSOD1 gene in transgenic pigs.

| TG pigs | Copy No.   |
|---------|------------|
| TG1     | 1.02±0.02  |
| TG2     | 0.93±0.05  |
| TG3     | 0.94±0.02  |
| TG5     | 1.12±0.02  |
| TG6     | 1.08±0.01  |
| TG7     | 8.42±0.15  |
| TG8     | 2.85±0.01  |
| TG9     | 9.18±0.09  |
| TG10    | 5.28±0.18  |
| TG11    | 9.24±2.88  |
| TG12    | 6.12±0.08  |
| TG13    | 6.84±0.06  |
| TG14    | 2.35±0.02  |
| TG15    | 1.42±0.02  |
| TG16    | 2.40±0.12  |
| TG17    | 5.56±1.00  |
| TG18    | 7.22±0.02  |
| TG19    | 8.73±0.20  |
| TG20    | 20.61±0.84 |
| TG21    | 20.22±1.24 |
| TG22    | 6.21±0.12  |
| 11-4    | 8.62±1.81  |
| 7-1     | 7.48±0.40  |
| 7-2     | 1.13±0.04  |
| 7-3     | 0.89±0.17  |
| 7-4     | 1.15±0.08  |
| 7-5     | 7.97±1.27  |
| 7-6     | 0.76±0.18  |
| 7-7     | 7.65±0.69  |
