# Supplementary material
Source: PubMed Central journal article supplement (PMC3975503)
Supplement: cr201425x6.pdf [file cr201425x6.pdf]

**Supplementary information, Table S2** Body weight of hSOD1 transgenic and WT pigs.

|     |      | 3 months (kg) | Average (kg) | 6 months (kg) | Average (kg) |
|-----|------|---------------|--------------|---------------|--------------|
| TG  | TG1  | 16.5          | 19.1±1.9     | 27.5          | 30.7±2.7     |
|     | TG2  | 19.7          |              | 30.6          |              |
|     | TG3  | 18            |              | -             |              |
|     | TG5  | 20.3          |              | 33.8          |              |
|     | TG6  | 16.8          |              | 28.5          |              |
|     | TG7  | 18.8          |              | 29.7          |              |
|     | TG8  | 19.5          |              | -             |              |
|     | TG9  | 18.5          |              | 28.5          |              |
|     | TG10 | 20.3          |              | 33.6          |              |
|     | TG11 | 22.6          |              | 36.2          |              |
|     | TG12 | 16.6          |              | 29.5          |              |
|     | TG13 | 17.5          |              | 29            |              |
|     | TG14 | 21.4          |              | -             |              |
|     | TG15 | 20.6          |              | -             |              |
|     | TG16 | 20.5          |              | 31.2          |              |
|     | TG17 | 17.4          |              | -             |              |
|     | TG18 | 19.7          |              | -             |              |
|     | TG19 | 20.5          |              | -             |              |
|     | TG20 | 22.3          |              | -             |              |
|     | TG21 | 16.4          |              | -             |              |
|     | TG22 | 17            |              | -             |              |
|     | WT   | TG4           |              | 18.8          |              |
| WT1 |      | 21.3          | 32.4         |               |              |
| WT2 |      | 22.4          | 35           |               |              |
| WT3 |      | 20            | 31.8         |               |              |

Note: dashes represent unavailable data from the animals that were dead before 6 months due to unknown reasons.

WT1, WT2, and WT3 are wild type Tibetan miniature pigs at the same age as TG pigs.
